# Supplementary material for: Protective Effect of Parsley Juice (Petroselinum crispum, Apiaceae) against Cadmium Deleterious Changes in the Developed Albino Mice Newborns (Mus musculus) Brain
Source: Hindawi journal article supplement (doi:10.1155/2016/2646840), 2016-01-01
Supplement: f1 [file 2646840.f1.pdf]

Supplementary table 1 Conditions of ELAN 9000 ICP-MS

|                      |              |
|----------------------|--------------|
| RF power             | 1250 W       |
| Nebulizer gas flow   | 0.92 L/min   |
| Lens Voltage         | 9.25 V       |
| Analog Stage Voltage | -1762.5 V    |
| Pulse Stage Voltage  | 1050 V       |
| Number of Replicates | 3            |
| Reading / Replicates | 20           |
| Scan Mode            | Peak Hopping |
| Dwell Time           | 40 ms        |
| Integration          | 1200ms       |
